# Supplementary material for: The Social Context of Pregnancy, Respectful Maternity Care, Biomarkers of Weathering, and Postpartum Mental Health Inequities: A Scoping Review
Source: MDPI journal article supplement (doi:10.3390/ijerph21040480), 2024-04-15
Supplement: s1 [file s1]

**Supplemental Table S1: Locations of included studies**

| <b>Region</b>                                                | <b>N</b> | <b>Country</b> | <b>n</b> |
|--------------------------------------------------------------|----------|----------------|----------|
| Americas                                                     | 34       | Brazil         | 4        |
|                                                              |          | Canada         | 3        |
|                                                              |          | United States  | 27       |
| Asia                                                         | 7        | Israel         | 2        |
|                                                              |          | Japan*         | 2        |
|                                                              |          | Russia         | 2        |
|                                                              |          | Thailand*      | 1        |
| Europe                                                       | 28       | Belgium        | 1        |
|                                                              |          | Croatia        | 1        |
|                                                              |          | France         | 4        |
|                                                              |          | Germany        | 5        |
|                                                              |          | Ireland        | 2        |
|                                                              |          | Italy          | 2        |
|                                                              |          | Norway         | 1        |
|                                                              |          | Spain          | 4        |
|                                                              |          | Sweden         | 2        |
|                                                              |          | Switzerland    | 1        |
|                                                              |          | United Kingdom | 5        |
| Oceania                                                      | 5        | Australia      | 5        |
| Total                                                        | 74       |                |          |
| *Japan and Thailand were included for biomarker studies only |          |                |          |

# SUPPLEMENTAL FILE

OSF search protocol registration:

[https://osf.io/t5pv7/?view\\_only=d16279c74d814975a44ac70eef3af2ad](https://osf.io/t5pv7/?view_only=d16279c74d814975a44ac70eef3af2ad)

Ovid MEDLINE(R) ALL

|    |                                                                                                                                                                                                                                                                                         |
|----|-----------------------------------------------------------------------------------------------------------------------------------------------------------------------------------------------------------------------------------------------------------------------------------------|
| 1  | [CONCEPT ONE: experiences/exposures/trauma/mistreatment/stress/disadvantage]                                                                                                                                                                                                            |
| 2  | ["obstetric violence" interpreted here as being caused by medical personnel]                                                                                                                                                                                                            |
| 3  | exp maternal health services/                                                                                                                                                                                                                                                           |
| 4  | exp labor, obstetric/                                                                                                                                                                                                                                                                   |
| 5  | exp delivery, obstetric/                                                                                                                                                                                                                                                                |
| 6  | 3 or 4 or 5                                                                                                                                                                                                                                                                             |
| 7  | exp violence/or violen\$.ti.                                                                                                                                                                                                                                                            |
| 8  | 6 and 7                                                                                                                                                                                                                                                                                 |
| 9  | (obstetric* adj3 violen*).tw,kf.                                                                                                                                                                                                                                                        |
| 10 | 8 or 9                                                                                                                                                                                                                                                                                  |
| 11 | [end of obstetric violence. this term is used more away from USA, and with disadvantaged and immigrants, etc.]                                                                                                                                                                          |
| 12 | [begin respectful maternity care]                                                                                                                                                                                                                                                       |
| 13 | "respectful matern* care".tw,kf.                                                                                                                                                                                                                                                        |
| 14 | exp Maternal Health Services/or exp Delivery, Obstetric/or exp Parturition/                                                                                                                                                                                                             |
| 15 | 14 and (respectful\$ or polite\$ or considerate or dignified or gracious or thoughtful or attentive or mindful).ti,kf.                                                                                                                                                                  |
| 16 | 13 or 15                                                                                                                                                                                                                                                                                |
| 17 | [end respectful. this cd be broadened by finding other words for respectful]                                                                                                                                                                                                            |
| 18 | [perinatal stress is an "unfortunate" term because we don't know to whom it applies, mom or baby. the phrase is not used much. but I even saw "paternal perinatal stress" - and then: "stress" is "psychological" for the mom, and metabolic for the baby, says me; very squishy topic] |
| 19 | perinatal stress*.tw. or perinatal stress*.kf.                                                                                                                                                                                                                                          |
| 20 | [end of perinatal stress until we define it better; get a brainstorm; etc.]                                                                                                                                                                                                             |
| 21 | [traumatic birth, another phrase not used much. do we mean birth injuries, obstetric complications, or something more psychological?]                                                                                                                                                   |
| 22 | exp Delivery, Obstetric/or exp Obstetric Labor Complications/                                                                                                                                                                                                                           |
| 23 | 22 and traumatic.ti.                                                                                                                                                                                                                                                                    |
| 24 | (birth adj3 trauma\$).tw,kf.                                                                                                                                                                                                                                                            |
| 25 | 23 or 24                                                                                                                                                                                                                                                                                |
| 26 | [end of traumatic birth; this could, of course, be broadened, if "traumatic" were to get all fleshed-out]                                                                                                                                                                               |
| 27 | [pregnancy mistreatment. ouch, another!]                                                                                                                                                                                                                                                |
| 28 | ((mistreat* or cruel\$ or oppression or harassment or exploitation or neglect* or discrimination or brutality or bully* or inequity or malpractice) adj3 pregnan*).tw,kf.                                                                                                               |
| 29 | pregnancy mistreatment.af.                                                                                                                                                                                                                                                              |
| 30 | [right. "pregnancy mistreatment" is not a thing (in the published medical literature sense of the word)]                                                                                                                                                                                |
| 31 | [end of pregnancy mistreatment]                                                                                                                                                                                                                                                         |
| 32 | [pregnancy marginalization; it's "not a thing" as a phrase; see next set. Of course, as a concept, it's searchable...]                                                                                                                                                                  |
| 33 | (marginaliz* adj3 pregnan*).tw,kf.                                                                                                                                                                                                                                                      |

|    |                                                                                                                                    |
|----|------------------------------------------------------------------------------------------------------------------------------------|
| 34 | exp maternal health services/or exp pregnant women/or exp prenatal care/                                                           |
| 35 | exp Social Marginalization/or marginali*.ti.                                                                                       |
| 36 | 34 and 35                                                                                                                          |
| 37 | 33 or 36                                                                                                                           |
| 38 | [end of marginalization. of course this idea of "marginalizing" could be broadened if defined in more medical-scientific terms...] |
| 39 | [pregnancy & socioeconomic disadvantage or socio... deprivation]                                                                   |
| 40 | [... and we'll add in "childbirth" (aka parturition)]                                                                              |
| 41 | exp Socioeconomic Factors/                                                                                                         |
| 42 | (socioeconomic adj2 (factor* or disadvantage* or depriv*)).tw,kf.                                                                  |
| 43 | 41 or 42                                                                                                                           |
| 44 | exp pregnancy/                                                                                                                     |
| 45 | exp parturition/                                                                                                                   |
| 46 | (pregnancy or childbirth).tw,kf.                                                                                                   |
| 47 | 44 or 45 or 46                                                                                                                     |
| 48 | 43 and 47                                                                                                                          |
| 49 | [end of pregnancy (or childbirth) and socioeconomic factors]                                                                       |
| 50 | 10 or 16 or 19 or 25 or 37 or 48                                                                                                   |
| 51 | [END OF CONCEPT ONE, WHICH IS EXPERIENCES & EXPOSURES]                                                                             |
| 52 | [CONCEPT TWO -- BIOMARKERS]                                                                                                        |
| 53 | [begin epigenetic age]                                                                                                             |
| 54 | (exp Epigenesis, Genetic/or exp epigenomics/) and age.ti.                                                                          |
| 55 | epigenetic age.tw,kf.                                                                                                              |
| 56 | 54 or 55                                                                                                                           |
| 57 | [end of epigenetic age]                                                                                                            |
| 58 | [begin weathering & allostatic load]                                                                                               |
| 59 | weathering.ti.                                                                                                                     |
| 60 | "wear and tear".tw,kf.                                                                                                             |
| 61 | "deteriorat* health".tw,kf.                                                                                                        |
| 62 | (exp allostasis/and load.ti.) or "allostatic load".tw,kf.                                                                          |
| 63 | 59 or 60 or 61 or 62                                                                                                               |
| 64 | 63 and (exp *pregnancy/or exp *pregnancy complications/or exp *pregnancy outcome/)                                                 |
| 65 | [end weathering & allostatic load]                                                                                                 |
| 66 | [begin hair cortisol]                                                                                                              |
| 67 | (hair adj5 cortisol).af.                                                                                                           |
| 68 | exp *Hydrocortisone/and exp *Hair/                                                                                                 |
| 69 | 67 or 68                                                                                                                           |
| 70 | [end hair cortisol]                                                                                                                |
| 71 | [begin microbiome]                                                                                                                 |
| 72 | exp Microbiota/                                                                                                                    |
| 73 | (microbiota or microbiome).tw,kf.                                                                                                  |
| 74 | 72 or 73                                                                                                                           |
| 75 | [end microbiome]                                                                                                                   |

|     |                                                                                                                                                                                                                                               |
|-----|-----------------------------------------------------------------------------------------------------------------------------------------------------------------------------------------------------------------------------------------------|
| 76  | [begin inflammation]                                                                                                                                                                                                                          |
| 77  | exp Inflammation Mediators/or exp Inflammation/                                                                                                                                                                                               |
| 78  | inflammat*.ti. or exp allostasis/or exp dna methylation/or exp epigenesis, genetic/or exp epigenomics/or exp hematopoietic stem cells/or exp telomere shortening/or exp gene-environment interaction/or intergenerational transmission.tw,kf. |
| 79  | 77 or 78                                                                                                                                                                                                                                      |
| 80  | [end of inflammation]                                                                                                                                                                                                                         |
| 81  | 56 or 64 or 69 or 74 or 79                                                                                                                                                                                                                    |
| 82  | [END OF CONCEPT TWO, WHICH IS (selected) BIOMARKERS]                                                                                                                                                                                          |
| 83  | [CONCEPT THREE: BIRTH OUTCOMES FOR MOM AND BABY]                                                                                                                                                                                              |
| 84  | [begin preterm birth]                                                                                                                                                                                                                         |
| 85  | exp Premature Birth/                                                                                                                                                                                                                          |
| 86  | ((premature or preterm) adj2 birth).tw,kf.                                                                                                                                                                                                    |
| 87  | 85 or 86                                                                                                                                                                                                                                      |
| 88  | [end preterm birth]                                                                                                                                                                                                                           |
| 89  | [begin low birth weight]                                                                                                                                                                                                                      |
| 90  | exp Infant, Low Birth Weight/                                                                                                                                                                                                                 |
| 91  | low birth weight.tw,kf.                                                                                                                                                                                                                       |
| 92  | 90 or 91                                                                                                                                                                                                                                      |
| 93  | [end low birth weight]                                                                                                                                                                                                                        |
| 94  | [begin postpartum depression]                                                                                                                                                                                                                 |
| 95  | exp Depression, Postpartum/                                                                                                                                                                                                                   |
| 96  | postpartum depression.tw,kf.                                                                                                                                                                                                                  |
| 97  | 95 or 96                                                                                                                                                                                                                                      |
| 98  | [end postpartum depression]                                                                                                                                                                                                                   |
| 99  | [begin postpartum anxiety]                                                                                                                                                                                                                    |
| 100 | (exp Depression, Postpartum/or exp Postpartum Period/) and (exp Anxiety Disorders/or exp Anxiety/)                                                                                                                                            |
| 101 | postpartum anxiety.ti,kf.                                                                                                                                                                                                                     |
| 102 | 100 or 101                                                                                                                                                                                                                                    |
| 103 | [end of postpartum anxiety]                                                                                                                                                                                                                   |
| 104 | [begin PTSD]                                                                                                                                                                                                                                  |
| 105 | exp Stress Disorders, Post-Traumatic/                                                                                                                                                                                                         |
| 106 | ptsd.ti,kf.                                                                                                                                                                                                                                   |
| 107 | post traumatic stress.tw,kf.                                                                                                                                                                                                                  |
| 108 | 105 or 106 or 107                                                                                                                                                                                                                             |
| 109 | [end of PTSD]                                                                                                                                                                                                                                 |
| 110 | [begin severe maternal morbidity]                                                                                                                                                                                                             |
| 111 | "severe maternal morbidity".af.                                                                                                                                                                                                               |
| 112 | [end severe maternal morbidity]                                                                                                                                                                                                               |
| 113 | [begin maternal mortality]                                                                                                                                                                                                                    |
| 114 | exp maternal mortality/or exp Obstetric Labor Complications/mo [Mortality]                                                                                                                                                                    |
| 115 | maternal mortality.tw,kf.                                                                                                                                                                                                                     |
| 116 | 114 or 115                                                                                                                                                                                                                                    |

|     |                                                                                                                            |
|-----|----------------------------------------------------------------------------------------------------------------------------|
| 117 | [end of maternal mortality]                                                                                                |
| 118 | [begin infant mortality]                                                                                                   |
| 119 | exp Infant Mortality/                                                                                                      |
| 120 | infant mortality.tw,kf. or exp pregnancy outcome/                                                                          |
| 121 | 119 or 120                                                                                                                 |
| 122 | [end infant mortality]                                                                                                     |
| 123 | 87 or 92 or 97 or 102 or 108 or 111 or 116 or 121                                                                          |
| 124 | [END OF CONCEPT THREE: BIRTH OUTCOMES FOR MOM & BABY]                                                                      |
| 125 | [COMBINATION OF THREE CONCEPTS]                                                                                            |
| 126 | 50 and 81 and 123                                                                                                          |
| 127 | [NOW, just 2 concepts: experiences/exposures AND Biomarkers]                                                               |
| 128 | 50 and 81                                                                                                                  |
| 129 | [NOW, just 2 concepts: Biomarkers and Outcomes]                                                                            |
| 130 | 81 and 123                                                                                                                 |
| 131 | [NOW, just 2 concepts: experiences/exposure AND outcomes]                                                                  |
| 132 | 50 and 123                                                                                                                 |
| 133 | 126 or 128 or 130 or 132                                                                                                   |
| 134 | 133 not ((exp animal/or exp invertebrate/or animal experiment/or animal model/or exp plant/or exp fungus/) not exp human/) |
| 135 | limit 134 to english language                                                                                              |
| 136 | [CONCEPT FOUR: MATERNAL MENTAL HEALTH]                                                                                     |
| 137 | exp *Mothers/                                                                                                              |
| 138 | exp *pregnancy/or exp *pregnancy complications/                                                                            |
| 139 | exp *Anxiety/                                                                                                              |
| 140 | exp *Stress Disorders, Post-Traumatic/                                                                                     |
| 141 | exp *depression, postpartum/                                                                                               |
| 142 | exp *Postpartum Period/and (exp *Anxiety Disorders/or exp *Anxiety/)                                                       |
| 143 | (mother\$ adj2 "mental health").tw,kf.                                                                                     |
| 144 | maternal mental health.tw,kf.                                                                                              |
| 145 | 137 or 138                                                                                                                 |
| 146 | 139 or 140 or 141 or 142 or 143 or 144                                                                                     |
| 147 | 145 and 146                                                                                                                |
| 148 | 135 and 147                                                                                                                |

# OVID Embase

|    |                                                                                                                                                                                                                                                                                         |
|----|-----------------------------------------------------------------------------------------------------------------------------------------------------------------------------------------------------------------------------------------------------------------------------------------|
| 1  | [CONCEPT ONE: experiences/exposures/trauma/mistreatment/stress/disadvantage]                                                                                                                                                                                                            |
| 2  | ["obstetric violence" interpreted here as being caused by medical personnel]                                                                                                                                                                                                            |
| 3  | exp maternal health services/                                                                                                                                                                                                                                                           |
| 4  | exp labor, obstetric/                                                                                                                                                                                                                                                                   |
| 5  | exp delivery, obstetric/                                                                                                                                                                                                                                                                |
| 6  | 3 or 4 or 5                                                                                                                                                                                                                                                                             |
| 7  | exp violence/or violen\$.ti.                                                                                                                                                                                                                                                            |
| 8  | 6 and 7                                                                                                                                                                                                                                                                                 |
| 9  | (obstetric* adj3 violen*).tw,kf.                                                                                                                                                                                                                                                        |
| 10 | 8 or 9                                                                                                                                                                                                                                                                                  |
| 11 | [end of obstetric violence. this term is used more away from USA, and with disadvantaged and immigrants, etc.]                                                                                                                                                                          |
| 12 | [begin respectful maternity care]                                                                                                                                                                                                                                                       |
| 13 | "respectful matern* care".tw,kf.                                                                                                                                                                                                                                                        |
| 14 | exp Maternal Health Services/or exp Delivery, Obstetric/or exp Parturition/                                                                                                                                                                                                             |
| 15 | 14 and (respectful\$ or polite\$ or considerate or dignified or gracious or thoughtful or attentive or mindful).ti,kf.                                                                                                                                                                  |
| 16 | 13 or 15                                                                                                                                                                                                                                                                                |
| 17 | [end respectful. this cd be broadened by finding other words for respectful]                                                                                                                                                                                                            |
| 18 | [perinatal stress is an "unfortunate" term because we don't know to whom it applies, mom or baby. the phrase is not used much. but I even saw "paternal perinatal stress" - and then: "stress" is "psychological" for the mom, and metabolic for the baby, says me; very squishy topic] |
| 19 | perinatal stress*.tw. or perinatal stress*.kf.                                                                                                                                                                                                                                          |
| 20 | [end of perinatal stress until we define it better; get a brainstorm; etc.]                                                                                                                                                                                                             |
| 21 | [traumatic birth, another phrase not used much. do we mean birth injuries, obstetric complications, or something more psychological?]                                                                                                                                                   |
| 22 | exp Delivery, Obstetric/or exp Obstetric Labor Complications/                                                                                                                                                                                                                           |
| 23 | 22 and traumatic.ti.                                                                                                                                                                                                                                                                    |
| 24 | (birth adj3 trauma\$).tw,kf.                                                                                                                                                                                                                                                            |
| 25 | 23 or 24                                                                                                                                                                                                                                                                                |
| 26 | [end of traumatic birth; this could, of course, be broadened, if "traumatic" were to get all fleshed-out]                                                                                                                                                                               |
| 27 | [pregnancy mistreatment. ouch, another!]                                                                                                                                                                                                                                                |
| 28 | ((mistreat* or cruel\$ or oppression or harassment or exploitation or neglect* or discrimination or brutality or bully* or inequity or malpractice) adj3 pregnan*).tw,kf.                                                                                                               |
| 29 | pregnancy mistreatment.af.                                                                                                                                                                                                                                                              |
| 30 | [right. "pregnancy mistreatment" is not a thing (in the published medical literature sense of the word)]                                                                                                                                                                                |
| 31 | [end of pregnancy mistreatment]                                                                                                                                                                                                                                                         |
| 32 | [pregnancy marginalization; it's "not a thing" as a phrase; see next set. Of course, as a concept, it's searchable...]                                                                                                                                                                  |
| 33 | (marginaliz* adj3 pregnan*).tw,kf.                                                                                                                                                                                                                                                      |
| 34 | exp maternal health services/or exp pregnant women/or exp prenatal care/                                                                                                                                                                                                                |
| 35 | exp Social Marginalization/or marginali*.ti.                                                                                                                                                                                                                                            |
| 36 | 34 and 35                                                                                                                                                                                                                                                                               |
| 37 | 33 or 36                                                                                                                                                                                                                                                                                |

|    |                                                                                                                                                                                                                                               |
|----|-----------------------------------------------------------------------------------------------------------------------------------------------------------------------------------------------------------------------------------------------|
| 38 | [end of marginalization. of course this idea of "marginalizing" could be broadened if defined in more medical-scientific terms...]                                                                                                            |
| 39 | [pregnancy & socioeconomic disadvantage or socio... deprivation]                                                                                                                                                                              |
| 40 | [... and we'll add in "childbirth" (aka parturition)]                                                                                                                                                                                         |
| 41 | exp Socioeconomic Factors/                                                                                                                                                                                                                    |
| 42 | (socioeconomic adj2 (factor* or disadvantage* or depriv*)).tw,kf.                                                                                                                                                                             |
| 43 | 41 or 42                                                                                                                                                                                                                                      |
| 44 | exp pregnancy/                                                                                                                                                                                                                                |
| 45 | exp parturition/                                                                                                                                                                                                                              |
| 46 | (pregnancy or childbirth).tw,kf.                                                                                                                                                                                                              |
| 47 | 44 or 45 or 46                                                                                                                                                                                                                                |
| 48 | 43 and 47                                                                                                                                                                                                                                     |
| 49 | [end of pregnancy (or childbirth) and socioeconomic factors]                                                                                                                                                                                  |
| 50 | 10 or 16 or 19 or 25 or 37 or 48                                                                                                                                                                                                              |
| 51 | [END OF CONCEPT ONE, WHICH IS EXPERIENCES & EXPOSURES]                                                                                                                                                                                        |
| 52 | [CONCEPT TWO -- BIOMARKERS]                                                                                                                                                                                                                   |
| 53 | [begin epigenetic age]                                                                                                                                                                                                                        |
| 54 | (exp Epigenesis, Genetic/or exp epigenomics/) and age.ti.                                                                                                                                                                                     |
| 55 | epigenetic age.tw,kf.                                                                                                                                                                                                                         |
| 56 | 54 or 55                                                                                                                                                                                                                                      |
| 57 | [end of epigenetic age]                                                                                                                                                                                                                       |
| 58 | [begin weathering & allostatic load]                                                                                                                                                                                                          |
| 59 | weathering.ti.                                                                                                                                                                                                                                |
| 60 | "wear and tear".tw,kf.                                                                                                                                                                                                                        |
| 61 | "deteriorat* health".tw,kf.                                                                                                                                                                                                                   |
| 62 | (exp allostasis/and load.ti.) or "allostatic load".tw,kf.                                                                                                                                                                                     |
| 63 | 59 or 60 or 61 or 62                                                                                                                                                                                                                          |
| 64 | 63 and (exp *pregnancy/or exp *pregnancy complications/or exp *pregnancy outcome/)                                                                                                                                                            |
| 65 | [end weathering & allostatic load]                                                                                                                                                                                                            |
| 66 | [begin hair cortisol]                                                                                                                                                                                                                         |
| 67 | (hair adj5 cortisol).af.                                                                                                                                                                                                                      |
| 68 | exp *Hydrocortisone/and exp *Hair/                                                                                                                                                                                                            |
| 69 | 67 or 68                                                                                                                                                                                                                                      |
| 70 | [end hair cortisol]                                                                                                                                                                                                                           |
| 71 | [begin microbiome]                                                                                                                                                                                                                            |
| 72 | exp Microbiota/                                                                                                                                                                                                                               |
| 73 | (microbiota or microbiome).tw,kf.                                                                                                                                                                                                             |
| 74 | 72 or 73                                                                                                                                                                                                                                      |
| 75 | [end microbiome]                                                                                                                                                                                                                              |
| 76 | [begin inflammation]                                                                                                                                                                                                                          |
| 77 | exp Inflammation Mediators/or exp Inflammation/                                                                                                                                                                                               |
| 78 | inflammat*.ti. or exp allostasis/or exp dna methylation/or exp epigenesis, genetic/or exp epigenomics/or exp hematopoietic stem cells/or exp telomere shortening/or exp gene-environment interaction/or intergenerational transmission.tw,kf. |

|     |                                                                                                    |
|-----|----------------------------------------------------------------------------------------------------|
| 79  | 77 or 78                                                                                           |
| 80  | [end of inflammation]                                                                              |
| 81  | 56 or 64 or 69 or 74 or 79                                                                         |
| 82  | [END OF CONCEPT TWO, WHICH IS (selected) BIOMARKERS]                                               |
| 83  | [CONCEPT THREE: BIRTH OUTCOMES FOR MOM AND BABY]                                                   |
| 84  | [begin preterm birth]                                                                              |
| 85  | exp Premature Birth/                                                                               |
| 86  | ((premature or preterm) adj2 birth).tw,kf.                                                         |
| 87  | 85 or 86                                                                                           |
| 88  | [end preterm birth]                                                                                |
| 89  | [begin low birth weight]                                                                           |
| 90  | exp Infant, Low Birth Weight/                                                                      |
| 91  | low birth weight.tw,kf.                                                                            |
| 92  | 90 or 91                                                                                           |
| 93  | [end low birth weight]                                                                             |
| 94  | [begin postpartum depression]                                                                      |
| 95  | exp Depression, Postpartum/                                                                        |
| 96  | postpartum depression.tw,kf.                                                                       |
| 97  | 95 or 96                                                                                           |
| 98  | [end postpartum depression]                                                                        |
| 99  | [begin postpartum anxiety]                                                                         |
| 100 | (exp Depression, Postpartum/or exp Postpartum Period/) and (exp Anxiety Disorders/or exp Anxiety/) |
| 101 | postpartum anxiety.ti,kf.                                                                          |
| 102 | 100 or 101                                                                                         |
| 103 | [end of postpartum anxiety]                                                                        |
| 104 | [begin PTSD]                                                                                       |
| 105 | exp Stress Disorders, Post-Traumatic/                                                              |
| 106 | ptsd.ti,kf.                                                                                        |
| 107 | post traumatic stress.tw,kf.                                                                       |
| 108 | 105 or 106 or 107                                                                                  |
| 109 | [end of PTSD]                                                                                      |
| 110 | [begin severe maternal morbidity]                                                                  |
| 111 | "severe maternal morbidity".af.                                                                    |
| 112 | [end severe maternal morbidity]                                                                    |
| 113 | [begin maternal mortality]                                                                         |
| 114 | exp maternal mortality/                                                                            |
| 115 | maternal mortality.tw,kf.                                                                          |
| 116 | 114 or 115                                                                                         |
| 117 | [end of maternal mortality]                                                                        |
| 118 | [begin infant mortality]                                                                           |
| 119 | exp Infant Mortality/                                                                              |
| 120 | infant mortality.tw,kf. or exp pregnancy outcome/                                                  |



|     |                                                                                                                            |
|-----|----------------------------------------------------------------------------------------------------------------------------|
| 121 | 119 or 120                                                                                                                 |
| 122 | [end infant mortality]                                                                                                     |
| 123 | 87 or 92 or 97 or 102 or 108 or 111 or 116 or 121                                                                          |
| 124 | [END OF CONCEPT THREE: BIRTH OUTCOMES FOR MOM & BABY]                                                                      |
| 125 | [COMBINATION OF THREE CONCEPTS]                                                                                            |
| 126 | 50 and 81 and 123                                                                                                          |
| 127 | [NOW, just 2 concepts: experiences/exposures AND Biomarkers]                                                               |
| 128 | 50 and 81                                                                                                                  |
| 129 | [NOW, just 2 concepts: Biomarkers and Outcomes]                                                                            |
| 130 | 81 and 123                                                                                                                 |
| 131 | [NOW, just 2 concepts: experiences/exposure AND outcomes]                                                                  |
| 132 | 50 and 123                                                                                                                 |
| 133 | 126 or 128 or 130 or 132                                                                                                   |
| 134 | 133 not ((exp animal/or exp invertebrate/or animal experiment/or animal model/or exp plant/or exp fungus/) not exp human/) |
| 135 | limit 134 to english language                                                                                              |
| 136 | [CONCEPT FOUR: MATERNAL MENTAL HEALTH]                                                                                     |
| 137 | exp *Mothers/                                                                                                              |
| 138 | exp *pregnancy/or exp *pregnancy complications/                                                                            |
| 139 | exp *Anxiety/                                                                                                              |
| 140 | exp *Stress Disorders, Post-Traumatic/                                                                                     |
| 141 | exp *depression, postpartum/                                                                                               |
| 142 | exp *Postpartum Period/and (exp *Anxiety Disorders/or exp *Anxiety/)                                                       |
| 143 | (mother\$ adj2 "mental health").tw,kf.                                                                                     |
| 144 | maternal mental health.tw,kf.                                                                                              |
| 145 | 137 or 138                                                                                                                 |
| 146 | 139 or 140 or 141 or 142 or 143 or 144                                                                                     |
| 147 | 145 and 146                                                                                                                |
| 148 | 135 and 147                                                                                                                |
